# Supplementary material for: Space conjugation induced white light and room-temperature phosphorescence from simple organic small molecules: single-component WLED driven by both UV and blue chips
Source: Royal Society of Chemistry journal article supplement (doi:10.1039/d1qm00794g), 2021-01-01
Supplement: d1qm00794g1.pdf [file d1qm00794g1.pdf]

Electronic supplementary information

**Space conjugation induced white light and room-temperature phosphorescence from simple organic small molecule: Single-component WLED driven by both UV and blue chips**

Xin Zheng<sup>a</sup>, Yuanshan Huang<sup>a</sup>, Duoduo Xiao<sup>b</sup>, Shuming Yang<sup>a</sup>, Zhenghuan Lin<sup>\*a</sup> and Qidan Ling<sup>c</sup>

*<sup>a</sup> Fujian Key Laboratory of Polymer Materials, College of Chemistry and Materials Science, Fujian Normal University, Fuzhou 350007, China.*

E-mail: zhlin@fjnu.edu.cn

*<sup>b</sup> College of Chemistry, Guangdong University of Petrochemical Technology, Maoming 525000, China.*

*<sup>c</sup> Fujian Provincial Key Laboratory of Advanced Materials Oriented Chemical Engineering, Fuzhou, 350007, China*

## EXPERIMENTAL SECTION

### General methods.

UV-visible absorption spectra of the dilute solution were measured by a Shimadzu UV-2600 spectrophotometer. Fluorescence spectra of the solution and crystal were obtained on an Edinburgh Instruments FS5 Steady State Fluorescence Spectrofluorometer. NMR spectra were measured in DMSO-*d*<sub>6</sub> on a Bruker Ascend 400 FT-NMR at room temperature. <sup>1</sup>H NMR and <sup>13</sup>C NMR chemical shifts were quoted relative to the internal standard tetramethylsilane. Photoluminescence absolute quantum yield ( $\Phi$ ) of the products was obtained at the room temperature using an Edinburgh Instruments FS5 Steady State Fluorescence Spectrofluorometer equipped with a 6-inch integrating sphere. Time-resolved fluorescence measurements were carried out using time-correlated single photon counting (TCSPC) spectrometer (Edinburgh Instruments FLS920) with an Edinburgh nF920 ultrafast nanosecond or microsecond flash lamp as the excitation source. Particle size was obtained at Malvern Zetasizer Nano ZSE.

### Materials

All reagents and solvents obtained from commercial suppliers were directly used without further purification unless otherwise stated. TAD and TIM were synthesized according to the reported procedure.<sup>[1-2]</sup>

**TAD.** Beige solid: Yield 85%. <sup>1</sup>H NMR (400MHz, DMSO-*d*<sub>6</sub>)  $\delta$  8.65 (s, 2H); <sup>13</sup>C NMR (101MHz, DMSO-*d*<sub>6</sub>)  $\delta$  157.44, 134.97, 131.91.

**TIM.** Yellow solid: Yield 68.3%. <sup>1</sup>H NMR (400MHz, DMSO-*d*<sub>6</sub>)  $\delta$  11.26 (s, 1H), 8.28 (s, 2H); <sup>13</sup>C NMR (101MHz, DMSO-*d*<sub>6</sub>)  $\delta$  163.74, 137.62, 127.77.

### X-ray crystallography

The single crystals of **TAD** and **TIM** were mounted on a glass fiber for the X-ray diffraction analysis. Data sets were collected on an Agilent Technologies SuperNova single crystal diffractometer equipped with a graphite monochromated Mo-*K* $\alpha$  radiation ( $\lambda = 1.54184 \text{ \AA}$ ) from a rotating anode generator at 100 K. Intensities were corrected for Lorentz-Polarization (*LP*) factors and empirical absorption using the  $\omega$  scan technique. The structures were solved by direct methods and refined on  $F^2$  with full matrix least-squares techniques using Siemens SHELXTL version 5 package of crystallographic software. Crystallographic data for their structure have been deposited

in the Cambridge Crystallographic Data Centre as supplementary publication no. CCDC 2062868 (for TAD) and 2062869 (for TIM).

### **Computational Methods**

Theory calculations were performed with the Gaussian 09 program package. The geometries at ground state were optimized by the density functional theory (DFT) method with the Becke three-parameter hybrid exchange and the Lee-Yang-Parr correlation functional (B3LYP) and 6-31G\* basis set. The excited state transition configurations were revealed by time-dependent (TD-B3LYP) using 6-31G\* basis sets.

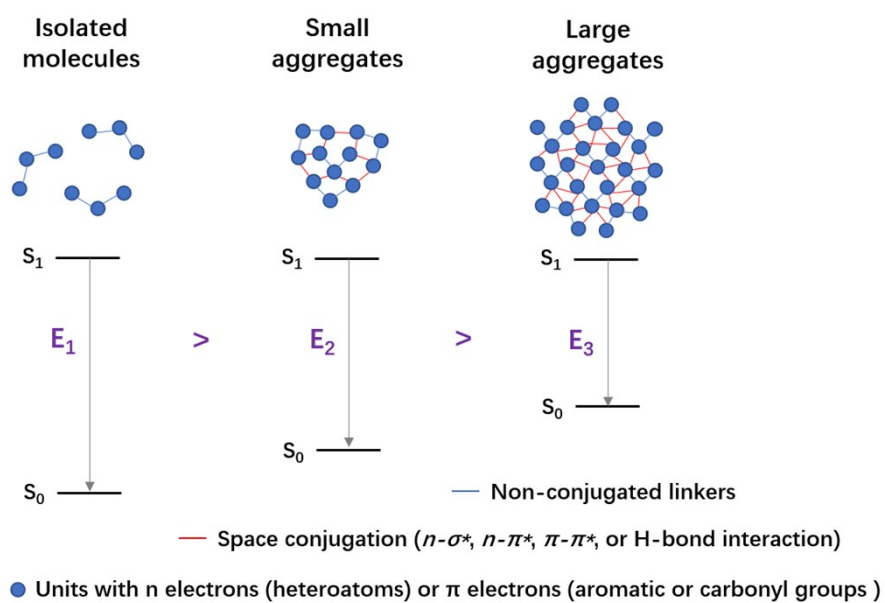

**Fig. S1** Schematic illustration of the effect of space conjugation (SC) on emission of nontraditional fluorophores.

**Table S1** Properties of single-component white light emitting materials based on small organic molecules.

| Organic dye | Molecular weight | $\Phi$ (%) | CIE (x, y) | CRI  | CCT (K) | Ref.      |
|-------------|------------------|------------|------------|------|---------|-----------|
| TAD         | 154              | 26.8       | 0.26, 0.30 |      |         | This work |
| TIM         | 153              | 11.8       | 0.33, 0.35 | 85   | 5669    |           |
| 1           | 189              | 2          | 0.31, 0.35 | 83   | 6218    | 3         |
| TPO-Br      | 454              |            | 0.31, 0.33 |      |         | 4         |
| PTZ-Ph-TTR  | 477              | 11         | 0.33, 0.33 | 92   |         | 5         |
| 2PQ-PTZ     | 479              |            | 0.32, 0.34 | 89   | 5850    | 6         |
| rac-BINAP   | 622              | 7.6        | 0.37, 0.44 | 73   |         | 7         |
| CTM         | 453              |            | 0.35, 0.35 | 88.8 |         | 8         |
| D1c         | 356              | 32         | 0.34, 0.36 |      |         | 9         |
| Cz9PhAn     | 660              | 47         | 0.30, 0.33 | 75.6 |         | 10        |
| 2           | 293              | 16         | 0.31, 0.34 |      |         | 11        |
| OPC         | 544              | 23         | 0.35, 0.35 |      |         | 12        |
| PTZ-BP      | 379              | 8          | 0.28, 0.30 |      |         | 13        |
| DPPZ        | 280              | 1          | 0.28, 0.33 |      |         | 14        |
| CIBDBT      | 322              | 7.2        | 0.33, 0.35 |      |         | 15        |
| ImBr        | 369              | 4.1        | 0.29, 0.35 |      |         | 16        |
| 3-DPH-XO    | 363              | 40         | 0.27, 0.35 |      |         | 17        |
| SDB2t       | 582              | 13         | 0.27, 0.27 |      |         | 18        |
| P3          | 310              | 36         | 0.28, 0.31 |      |         | 19        |

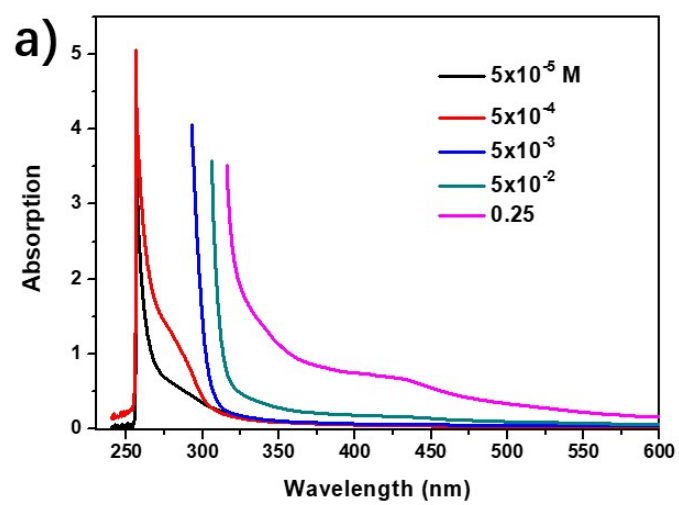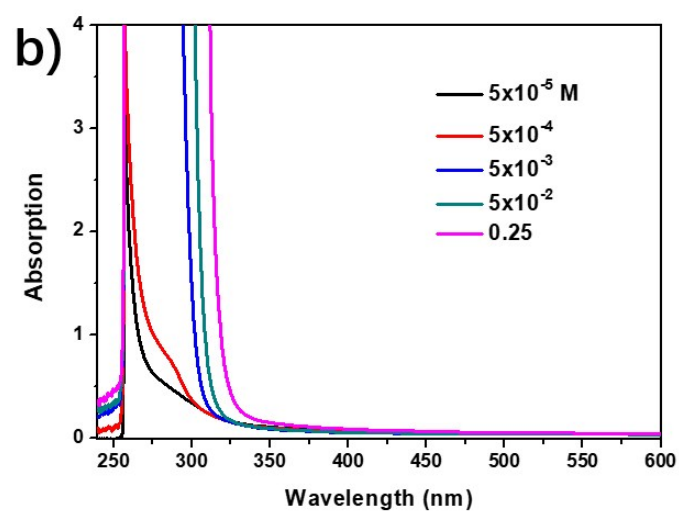

**Fig. S2** Absorption of TIM (a) and TAD (b) in DMF solution at different concentration.

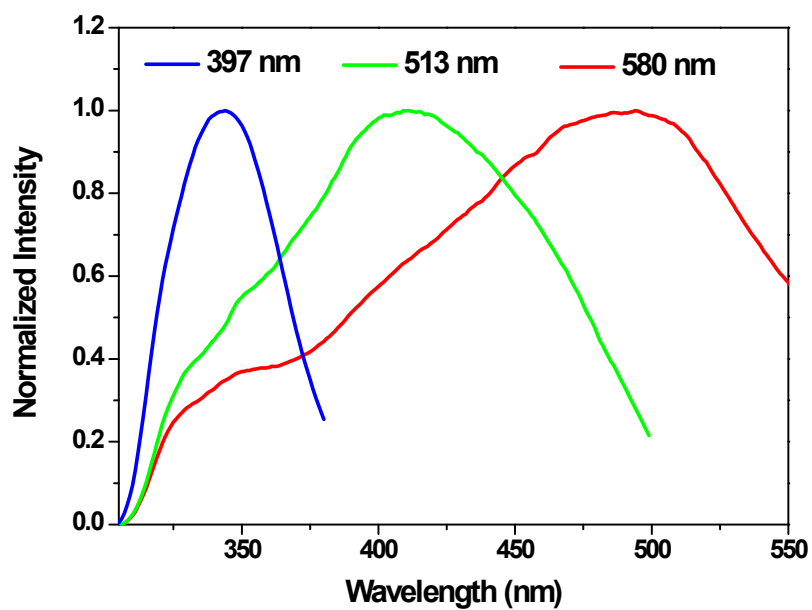

**Fig. S3** Excitation spectra monitored at different emissive peaks (397 nm, 513 nm and 580 nm) of TIM solution at 0.25 M.

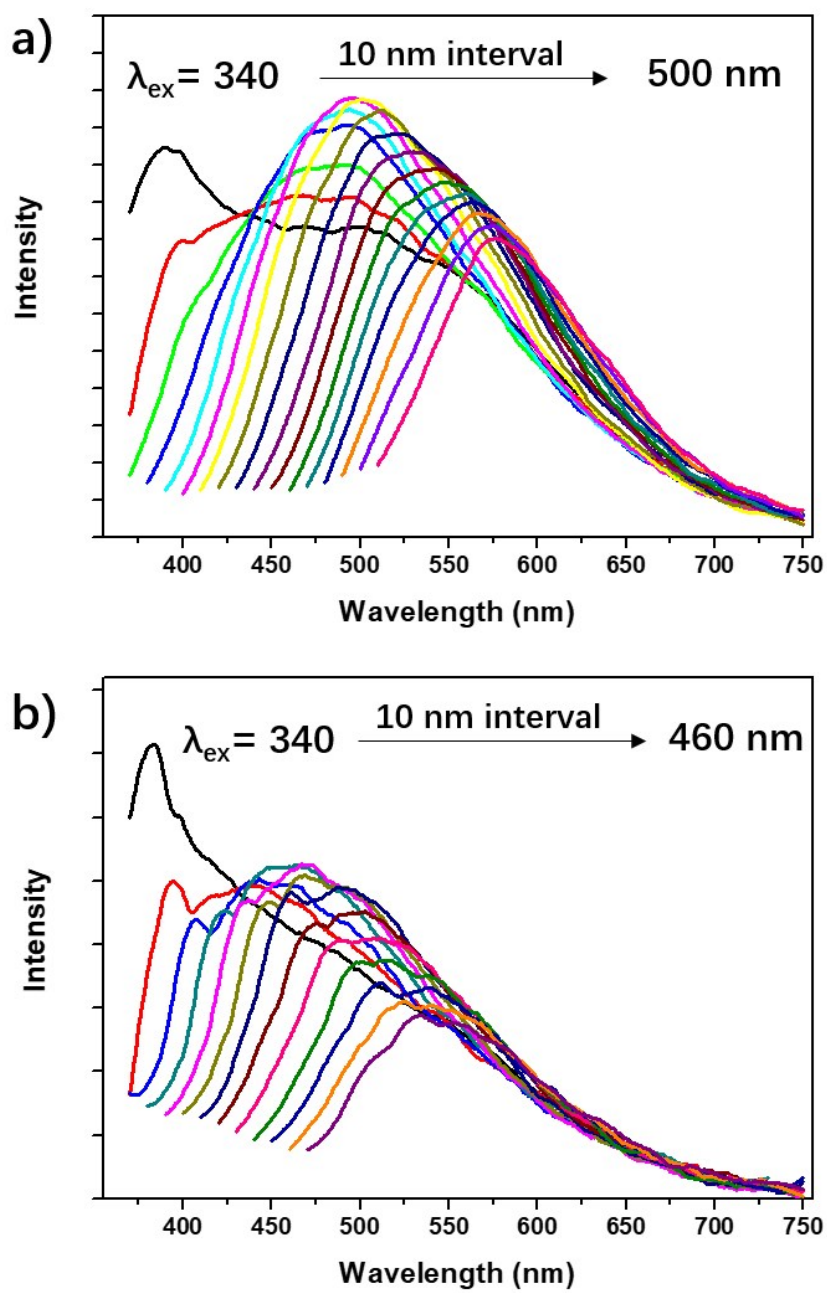

**Fig S4** Emission spectra of  $5 \times 10^{-2}$  M (a) and  $5 \times 10^{-3}$  M (b) solution excited at different wavelength.



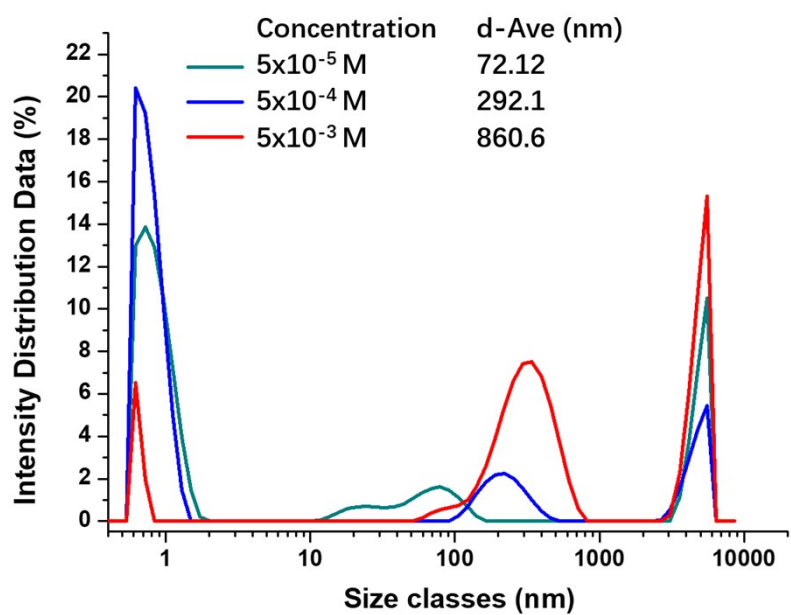

**Fig. S5** Particle size distribution curves and average particle size of TIM in solution with different concentration.

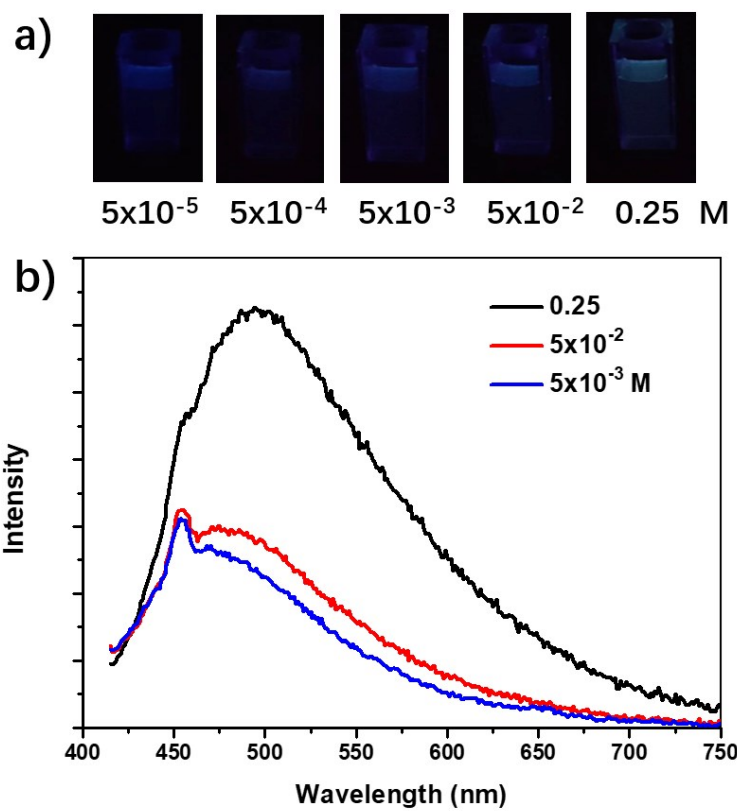

**Fig S6** Optic properties of TAD in solution at different concentration: a) Photos under 365 nm of UV lamp; b) Emission spectra under excitation at 398 nm.

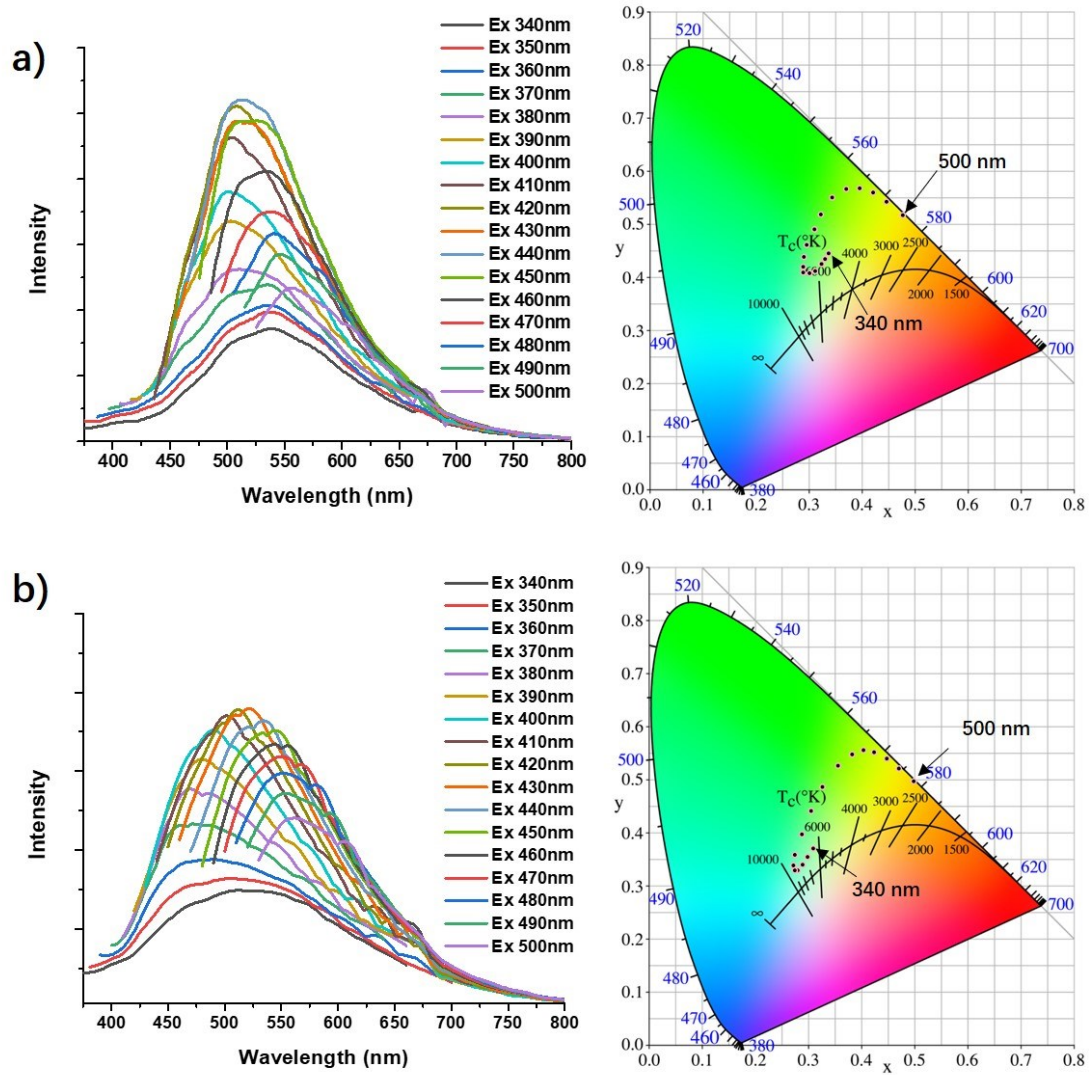

**Fig S7** Emission spectra (Left) and CIE coordination value (Right) of TIM (a) and TAD (b) crystals excited at different wavelength.

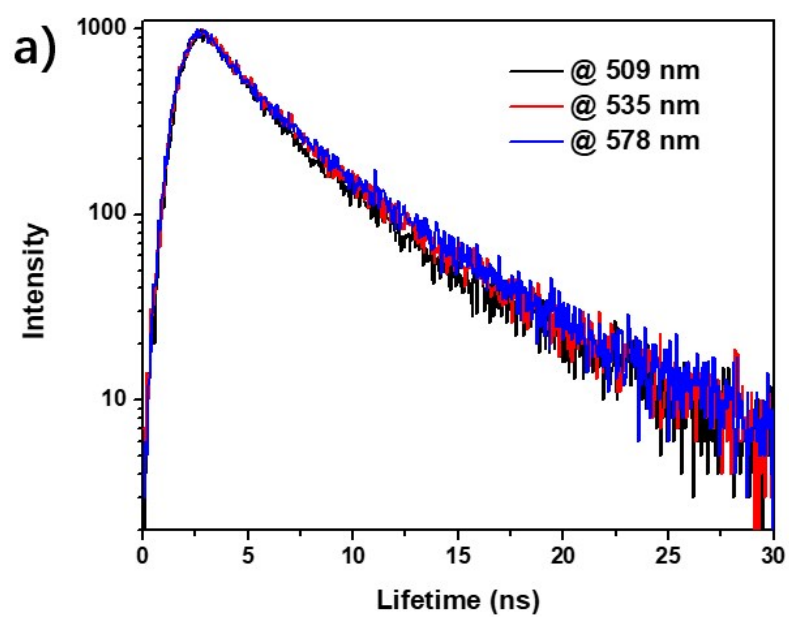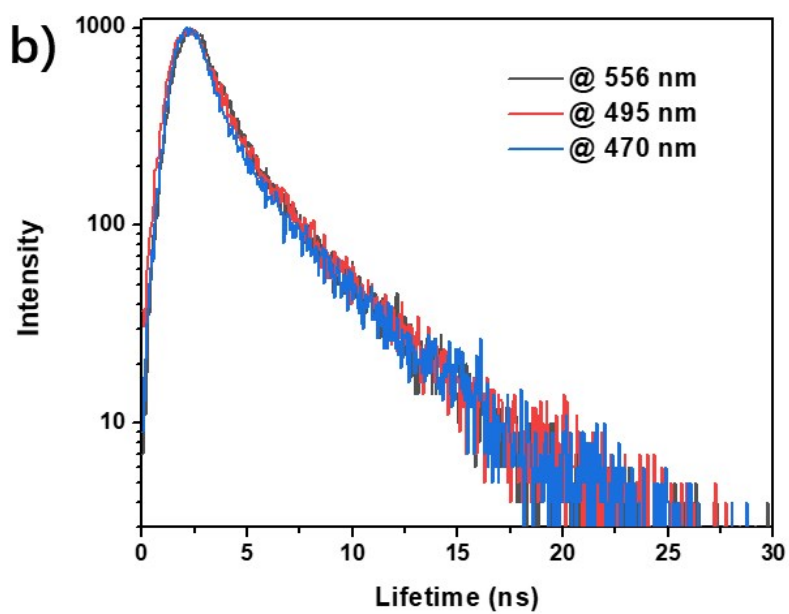

**Fig S8** Transient luminescence delay curves of TIM (a) and TAD (b).

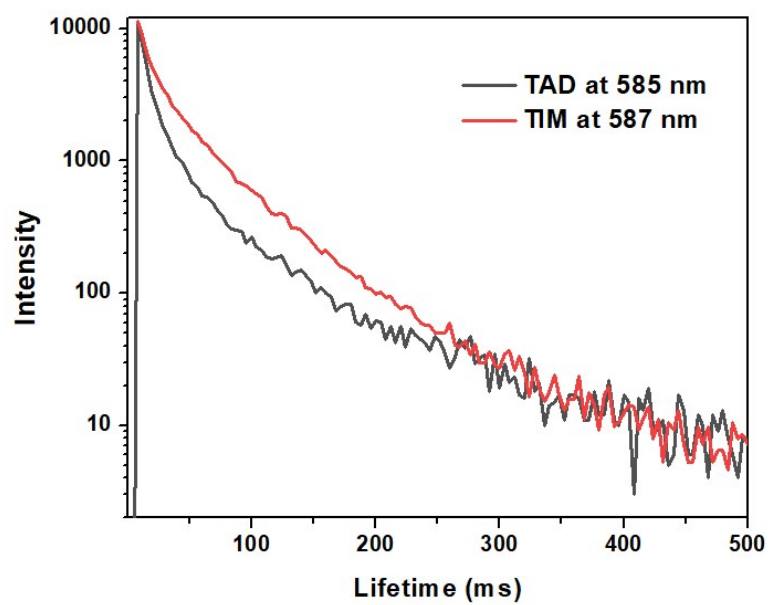

**Fig S9** Transient luminescence delay curves of TIM (a) and TAD (b).

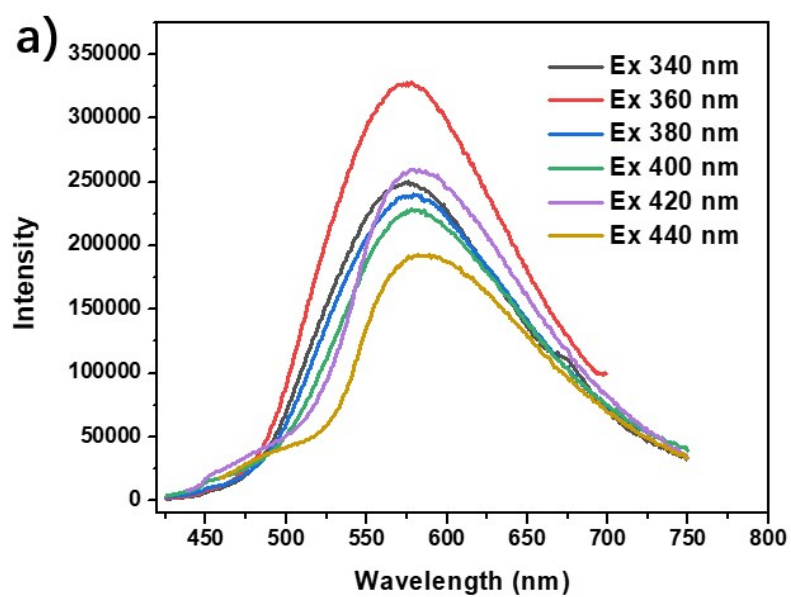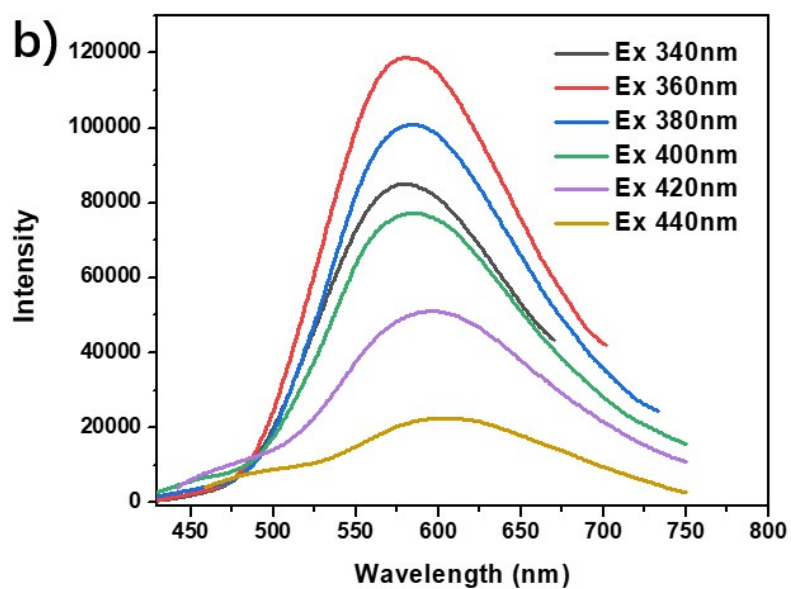

**Fig S10** Phosphorescence spectra of TIM (a) and TAD (b) crystals under different excitation wavelength.

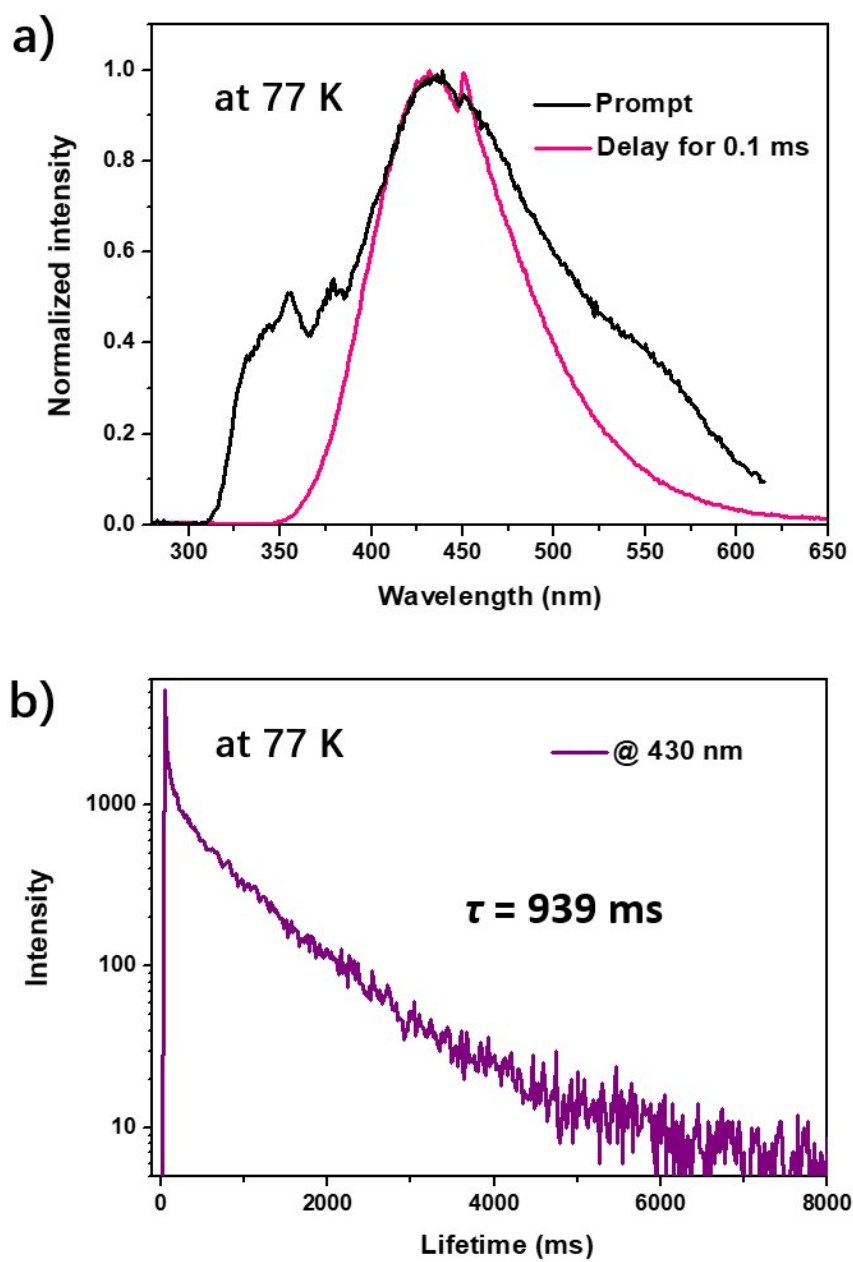

**Fig S11** Prompt and delay emission spectrum (a) and transient luminescence curve (b) of TIM in dilute solution ( $1 \times 10^{-6}$  M) at 77K.

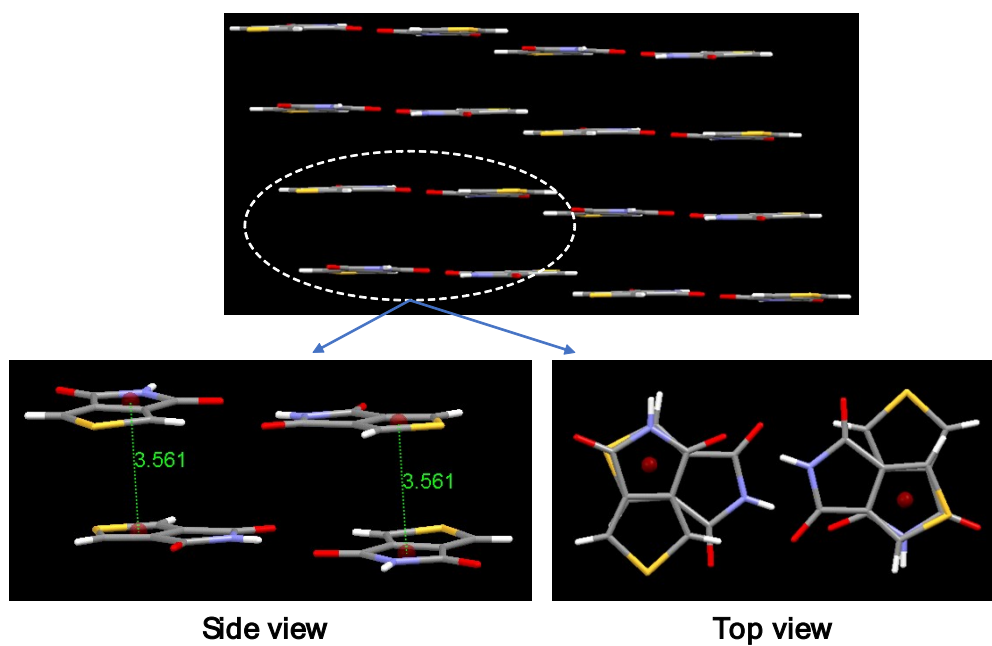

**Fig S12** Layered structure and interlayer interaction of TIM crystal.



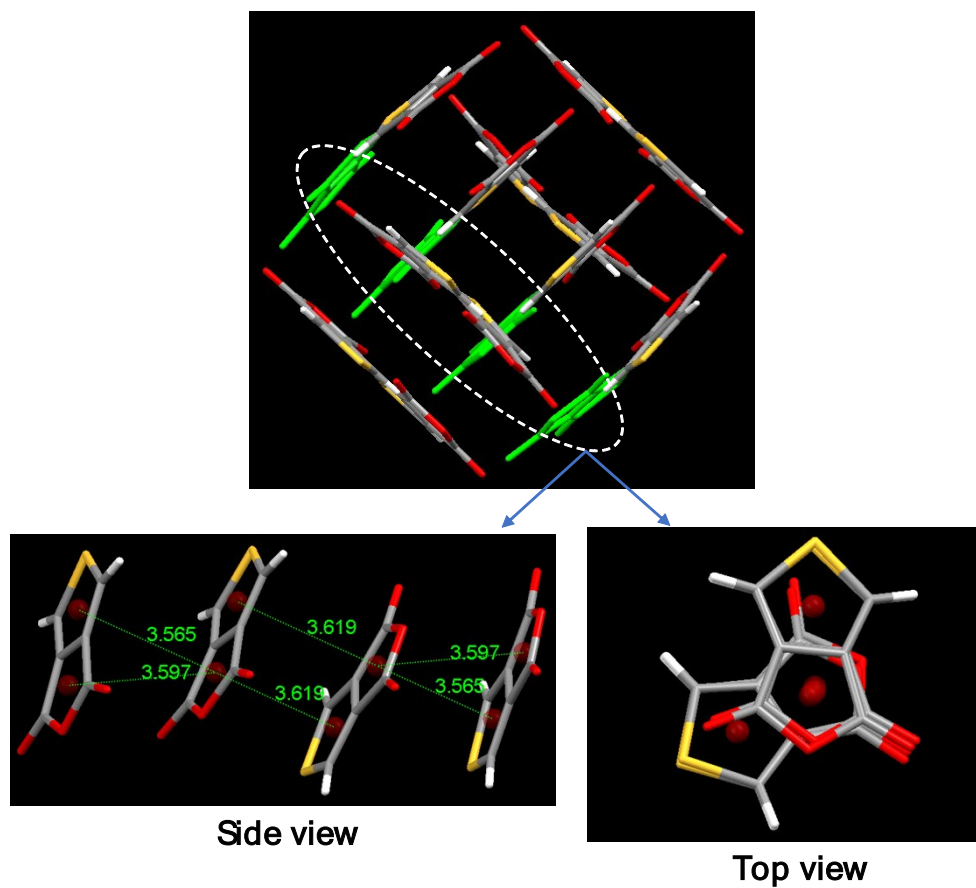

**Fig S13** Packing structure and intermolecular interaction of TAD crystal.

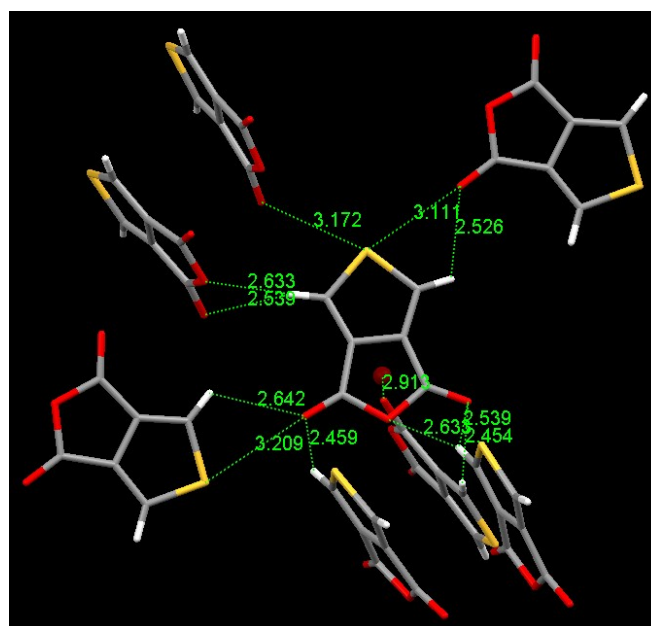

**Fig S14** Intermolecular interaction of TAD crystal.

**Table S2** Crystal data and structure refinement for TIM and TAD.

| Crystal                                  | TIM                                             | TAD                                                          |
|------------------------------------------|-------------------------------------------------|--------------------------------------------------------------|
| Formula                                  | C <sub>6</sub> H <sub>3</sub> NO <sub>2</sub> S | C <sub>12</sub> H <sub>4</sub> O <sub>6</sub> S <sub>2</sub> |
| Formula weight                           | 153.15                                          | 308.27                                                       |
| Shape                                    | block                                           | block                                                        |
| Crystal system                           | monoclinic                                      | tetragonal                                                   |
| Space group                              | P 21/c                                          | P4 <sub>1</sub> 2 <sub>1</sub> 2                             |
| a (Å)                                    | 10.920(4)                                       | 10.1007(5)                                                   |
| b (Å)                                    | 7.869(3)                                        | 10.1007(5)                                                   |
| c (Å)                                    | 7.186(4)                                        | 23.3207(16)                                                  |
| α(deg)                                   | 90.00                                           | 90.00                                                        |
| β(deg)                                   | 94.531(6)                                       | 90.00                                                        |
| γ(deg)                                   | 90.00                                           | 90.00                                                        |
| V (Å <sup>3</sup> )                      | 615.6(4)                                        | 2379.3(3)                                                    |
| Z                                        | 4                                               | 8                                                            |
| D <sub>calcd.</sub> (g/cm <sup>3</sup> ) | 1.653                                           | 1.721                                                        |
| F(000)                                   | 312                                             | 1248                                                         |
| R (int)                                  | 0.0373                                          | 0.0243                                                       |
| GOF on F <sup>2</sup>                    | 1.002                                           | 1.021                                                        |
| R1[I > 2σ(I)]                            | 0.0413                                          | 0.0211                                                       |
| wR2[I > 2σ(I)]                           | 0.0866                                          | 0.0544                                                       |
| R1 (all data)                            | 0.0624                                          | 0.0232                                                       |
| wR2(all data)                            | 0.0928                                          | 0.0557                                                       |

**Table S3** TDDFT computed absorption and emission properties of TIM and TAD monomer

| <b>Monomer</b> | <b>Transition</b> | <b>Excited state</b> | <b>Main orbital transition<sup>a</sup> (CIC)</b> | <b><i>E</i>, eV</b> | <b><i>λ</i>, nm</b> | <b><i>f</i></b> |
|----------------|-------------------|----------------------|--------------------------------------------------|---------------------|---------------------|-----------------|
| TIM            | Absorption        | S <sub>4</sub>       | HOMO-2→LUMO+1<br>(0.31)<br>HOMO→LUMO<br>(0.63)   | 4.86                | 255                 | 0.0198          |
|                | Emission          | S <sub>1</sub>       | LUMO+1→HOMO-3<br>(0.10)<br>LUMO→HOMO<br>(0.70)   | 3.46                | 358                 | 0.0001          |
| TAD            | Absorption        | S <sub>3</sub>       | HOMO-2→LUMO+1<br>(0.35)<br>HOMO→LUMO<br>(0.61)   | 4.92                | 252                 | 0.0125          |
|                | Emission          | S <sub>1</sub>       | LUMO→HOMO (-<br>0.68)<br>LUMO+1→HOMO<br>(0.18)   | 3.28                | 378                 | 0.0001          |

<sup>a</sup> CI expansion coefficients for the main orbital transitions.

**Table S4** TDDFT computed excited-state data of monomer and different aggregates of TIM.

| Type               | Excited state   | Main orbital transition <sup>a</sup><br>(CIC) | $\lambda$ , nm | $f$    |
|--------------------|-----------------|-----------------------------------------------|----------------|--------|
| Monomer            | S <sub>4</sub>  | HOMO-2→LUMO+1 (0.31)                          | 255            | 0.0198 |
|                    |                 | HOMO→LUMO (0.63)                              |                |        |
|                    | S <sub>7</sub>  | HOMO→LUMO+1 (0.69)                            | 224            | 0.0405 |
|                    | S <sub>9</sub>  | HOMO-4→LUMO+1 (-0.44)                         | 209            | 0.3262 |
|                    |                 | HOMO-2→LUMO+1 (0.45)<br>HOMO→LUMO (-0.27)     |                |        |
| CH-Tetramer        | S <sub>4</sub>  | HOMO-3→LUMO+2 (0.37)                          | 296            | 0.0002 |
|                    |                 | HOMO-2→LUMO+3 (0.37)                          |                |        |
|                    | S <sub>9</sub>  | HOMO-6→LUMO+2 (-0.30)                         | 262            | 0.0033 |
|                    |                 | HOMO-1→LUMO (0.48)                            |                |        |
|                    | S <sub>19</sub> | HOMO-1→LUMO+3 (0.41)<br>HOMO→LUMO+2 (0.42)    | 257            | 0.1040 |
| NH-Tetramer        | S <sub>2</sub>  | HOMO-8→LUMO (-0.29)                           | 297            | 0.0002 |
|                    |                 | HOMO-8→LUMO+1 (0.63)                          |                |        |
|                    | S <sub>7</sub>  | HOMO-1→LUMO (0.66)                            | 273            | 0.0010 |
|                    |                 | HOMO-1→LUMO+1 (0.25)                          |                |        |
|                    | S <sub>19</sub> | HOMO-6→LUMO (0.44)<br>HOMO-4→LUMO+1 (0.20)    | 259            | 0.0493 |
| $\pi\pi$ -Tetramer | S <sub>1</sub>  | HOMO-6→LUMO (0.43)                            | 305            | 0.0007 |
|                    |                 | HOMO-4→LUMO (0.23)                            |                |        |
|                    | S <sub>9</sub>  | HOMO-2→LUMO (0.49)                            | 270            | 0.0041 |
|                    |                 | HOMO-1→LUMO+1 (0.26)                          |                |        |
|                    | S <sub>14</sub> | HOMO-5→LUMO (-0.28)<br>HOMO-5→LUMO+1 (0.33)   | 261            | 0.0048 |
| M-Tetramer         | S <sub>1</sub>  | HOMO-1→LUMO+3 (0.33)                          | 303            | 0.0004 |
|                    |                 | HOMO→LUMO+2 (0.27)                            |                |        |
|                    | S <sub>7</sub>  | HOMO-3→LUMO (0.41)                            | 272            | 0.0140 |
|                    |                 | HOMO-2→LUMO+1 (-0.39)                         |                |        |
|                    | S <sub>17</sub> | HOMO-3→LUMO+3 (0.30)<br>HOMO-2→LUMO+2 (-0.26) | 262            | 0.0102 |

<sup>a</sup> CI expansion coefficients for the main orbital transitions.

**Table S5** TDDFT computed excited-state data of monomer and different aggregates of TAD.

| Type            | Excited state   | Main orbital transition <sup>a</sup><br>(CIC) | $\lambda$ , nm | $f$    |
|-----------------|-----------------|-----------------------------------------------|----------------|--------|
| Monomer         | S <sub>3</sub>  | HOMO-2→LUMO+1 (0.35)<br>HOMO→LUMO (0.61)      | 252            | 0.0125 |
|                 | S <sub>7</sub>  | HOMO-2→LUMO (0.28)<br>HOMO→LUMO+1 (0.63)      | 228            | 0.0708 |
|                 | S <sub>8</sub>  | HOMO-2→LUMO+1 (0.59)<br>HOMO→LUMO (-0.35)     | 209            | 0.4589 |
| $\pi$ O-Dimer   | S <sub>5</sub>  | HOMO-5→LUMO+2 (0.25)<br>HOMO→LUMO (0.58)      | 254            | 0.0303 |
|                 | S <sub>8</sub>  | HOMO-1→LUMO+1 (0.56)<br>HOMO→LUMO+1 (-0.24)   | 245            | 0.0098 |
|                 | S <sub>20</sub> | HOMO-1→LUMO+2 (0.45)<br>HOMO→LUMO+2 (-0.34)   | 226            | 0.0920 |
| HO-Dimer        | S <sub>3</sub>  | HOMO→LUMO (0.69)                              | 277            | 0.0023 |
|                 | S <sub>9</sub>  | HOMO-3→LUMO (0.46)<br>HOMO-2→LUMO (0.33)      | 251            | 0.0167 |
|                 | S <sub>20</sub> | HOMO-3→LUMO+1 (0.52)<br>HOMO→LUMO+3 (0.26)    | 225            | 0.1017 |
| $\pi\pi$ -Dimer | S <sub>1</sub>  | HOMO→LUMO+3 (0.64)                            | 290            | 0.0004 |
|                 | S <sub>7</sub>  | HOMO-1→LUMO (0.33)<br>HOMO-1→LUMO+1 (0.53)    | 259            | 0.0138 |
|                 | S <sub>12</sub> | HOMO-2→LUMO (0.31)<br>HOMO-1→LUMO+2 (0.35)    | 242            | 0.0169 |
| OS-Dimer        | S <sub>3</sub>  | HOMO→LUMO (0.68)                              | 278            | 0.0007 |
|                 | S <sub>10</sub> | HOMO-2→LUMO+3 (-0.34)<br>HOMO→LUMO+2 (0.60)   | 251            | 0.0192 |
|                 | S <sub>18</sub> | HOMO-3→LUMO+1 (0.530)<br>HOMO→LUMO+3 (-0.34)  | 225            | 0.1104 |
| Tetramer        | S <sub>2</sub>  | HOMO→LUMO+1 (0.54)<br>HOMO→LUMO+2 (0.37)      | 311            | 0.0013 |
|                 | S <sub>3</sub>  | HOMO→LUMO+1 (0.45)<br>HOMO→LUMO+2 (-0.41)     | 307            | 0.0008 |
|                 | S <sub>7</sub>  | HOMO-3→LUMO (0.70)                            | 295            | 0.0034 |

<sup>a</sup> CI expansion coefficients for the main orbital transitions.

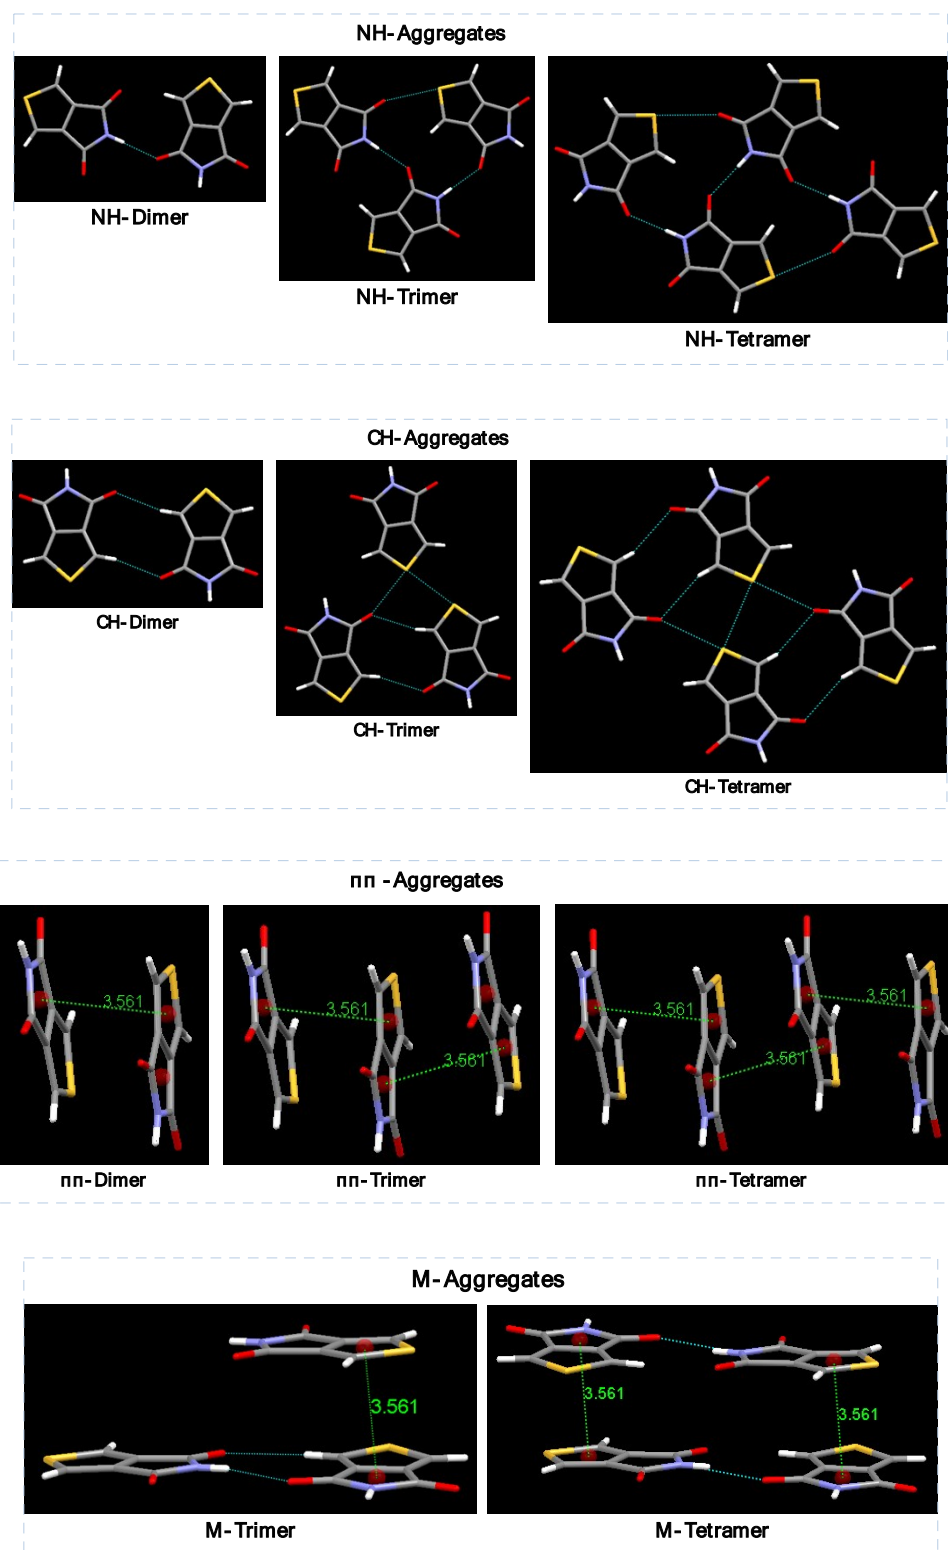

**Fig. S15** Different aggregates in TIM crystals.

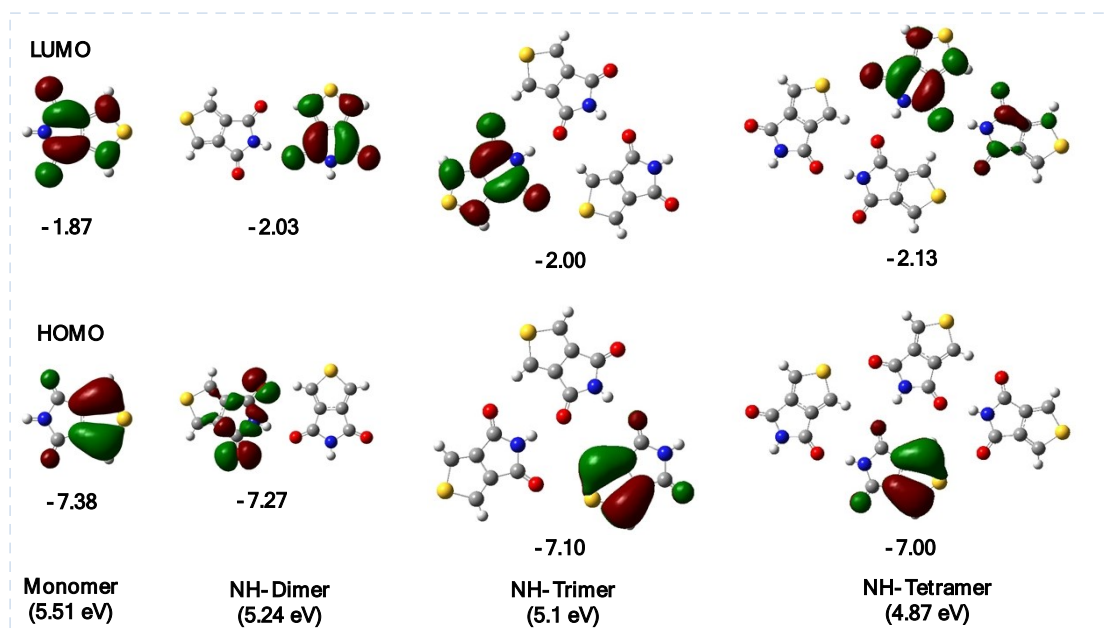

**Fig. S16** Calculated frontier orbitals of different NH-aggregates in TIM crystals.

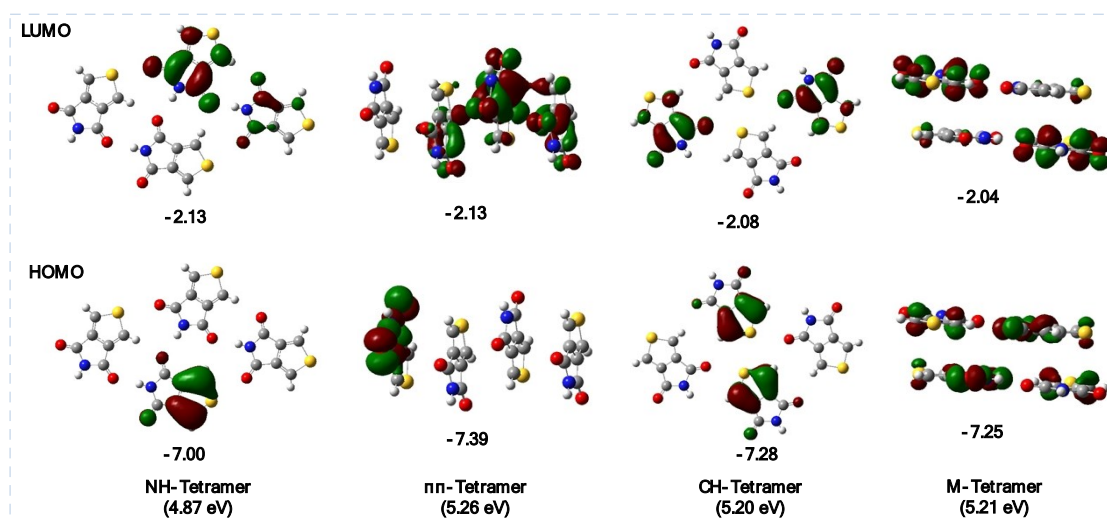

**Fig. S17** Calculated frontier orbitals of different tetramers in TIM crystals.

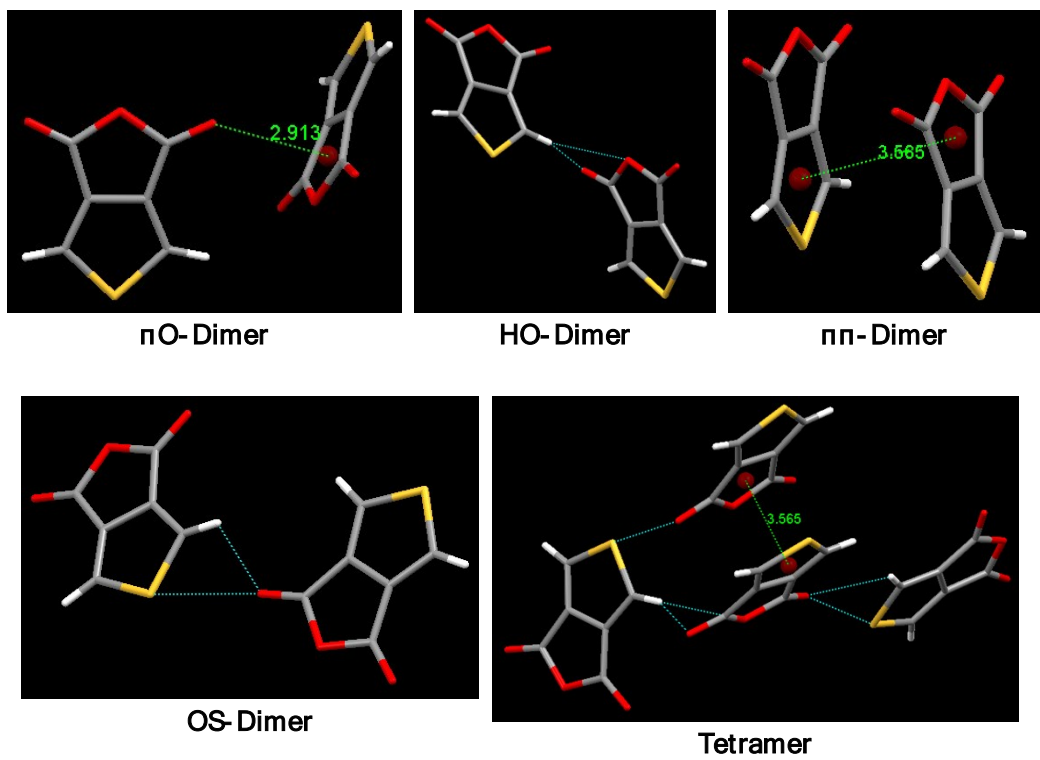

**Fig. S18** Different aggregates in TAD crystals.



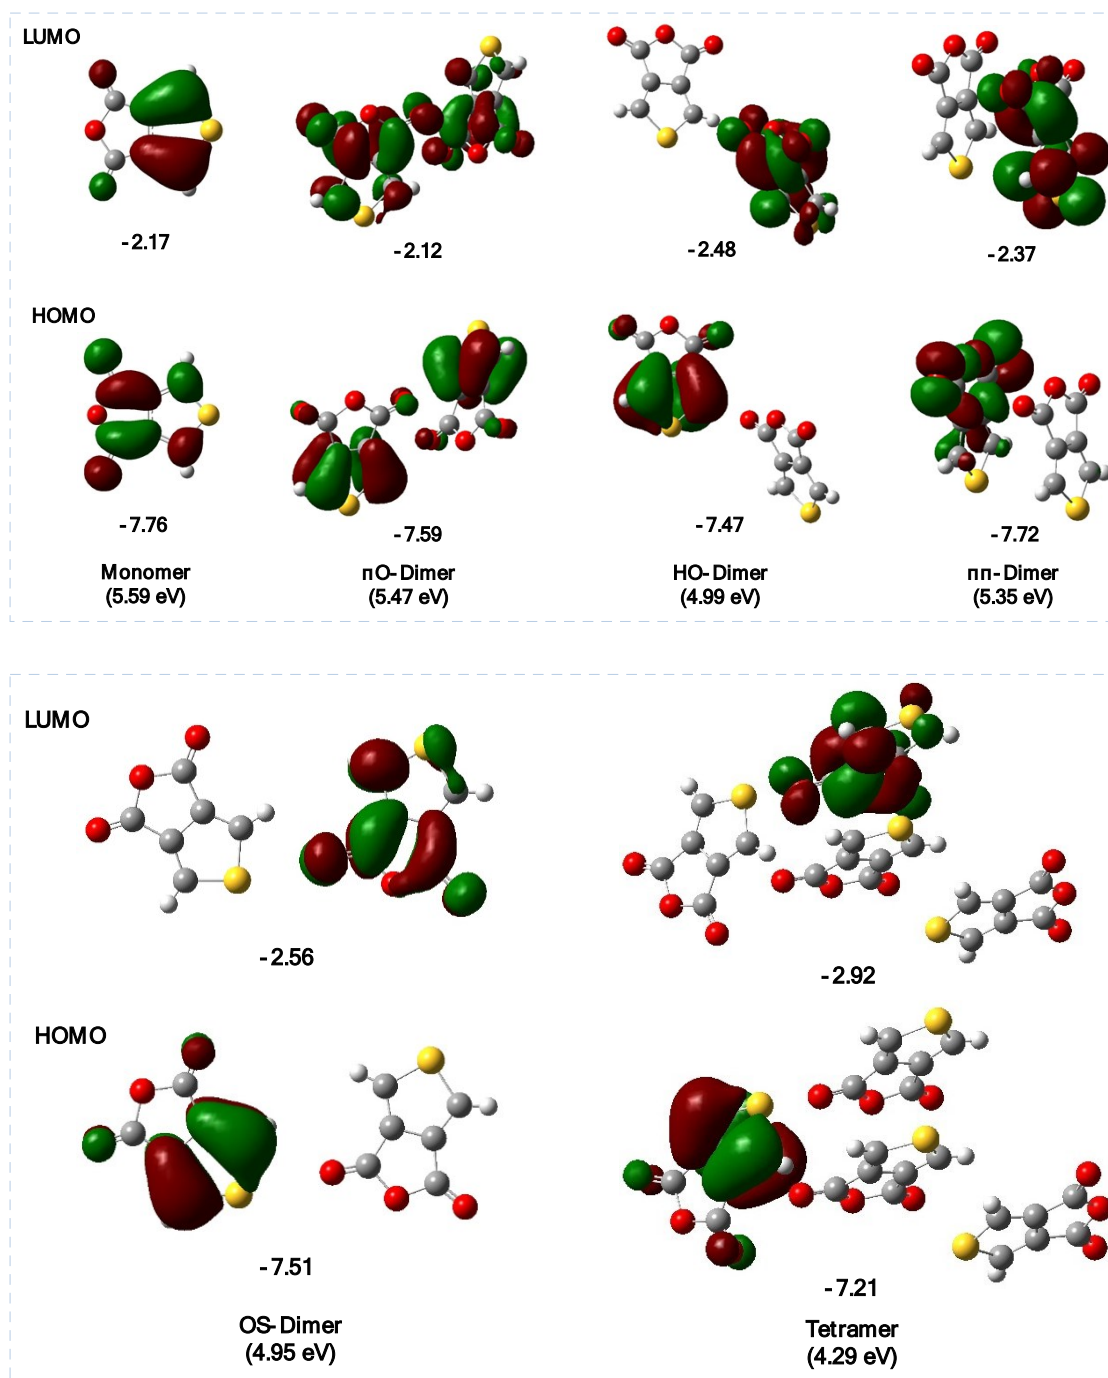

**Fig. S19** Calculated frontier orbitals of different tetramers in TAD crystals.

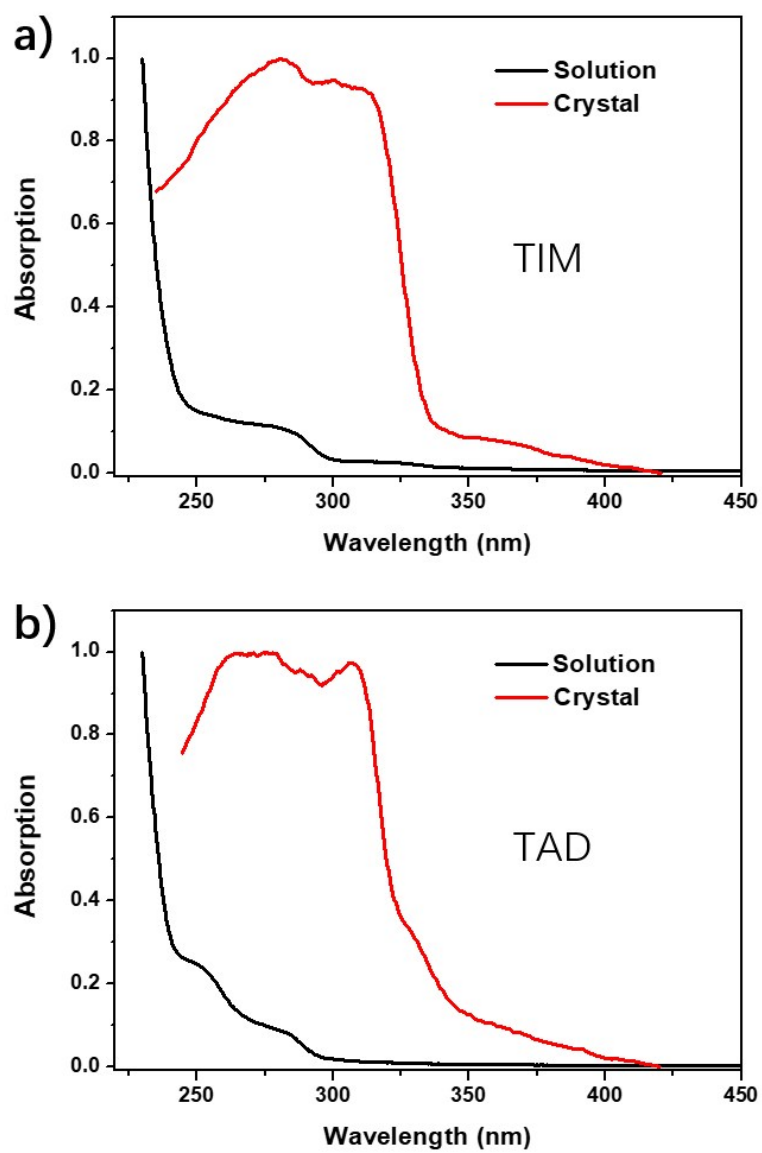

**Fig. S20** Absorption spectra of TIM (a) and TAD (b) in dilute chloroform solution and crystals.

**Table S6** Calculated singlet-triplet energy gap for TIM and TAD

| Compound | Type               | $E(S_1)$ , eV | $E(T_1)$ , eV | $\Delta E_{ST}$ , eV |
|----------|--------------------|---------------|---------------|----------------------|
| TIM      | Monomer            | 4.13          | 3.34          | 0.79                 |
|          | CH-Tetramer        | 4.18          | 3.45          | 0.73                 |
|          | NH-Tetramer        | 4.16          | 3.46          | 0.70                 |
|          | $\pi\pi$ -Tetramer | 4.07          | 3.40          | 0.67                 |
|          | M-Tetramer         | 4.09          | 3.43          | 0.66                 |
| TAD      | Monomer            | 4.39          | 3.25          | 1.14                 |
|          | $\pi$ O-Dimer      | 4.42          | 3.31          | 1.11                 |
|          | HO-Dimer           | 4.33          | 3.30          | 1.03                 |
|          | $\pi\pi$ -Dimer    | 4.28          | 3.29          | 0.99                 |
|          | OS-Dimer           | 4.39          | 3.33          | 1.06                 |
|          | Tetramer           | 3.80          | 3.30          | 0.5                  |

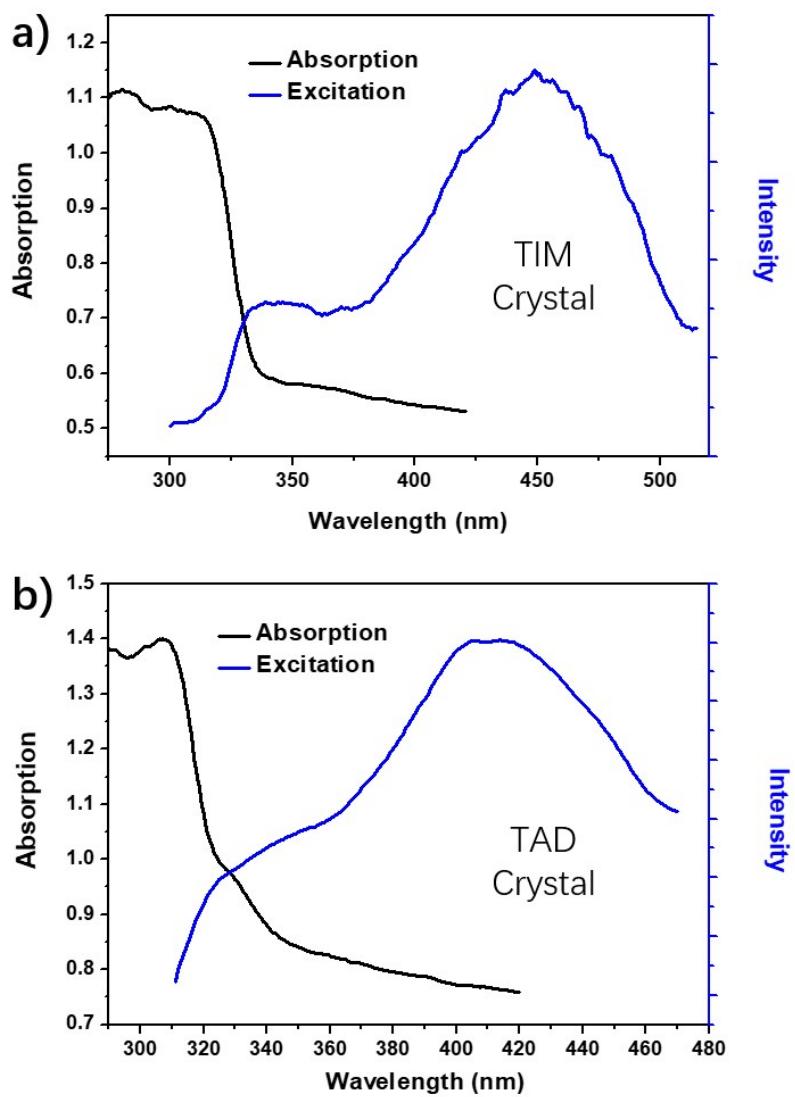

**Fig. S21** Comparison of absorption and excitation spectra of TIM (a) and TAD (b) in crystals.

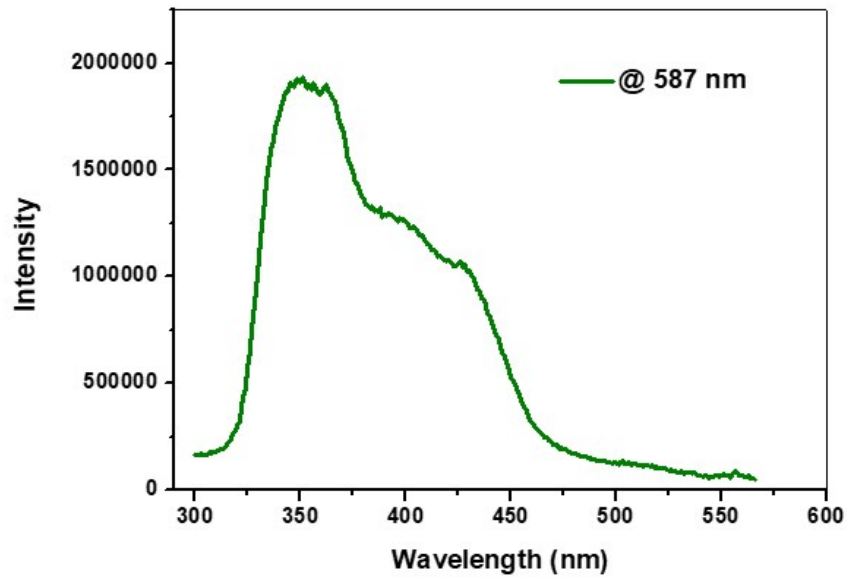

**Fig. S22** Excitation spectrum of phosphorescence of TIM crystal.

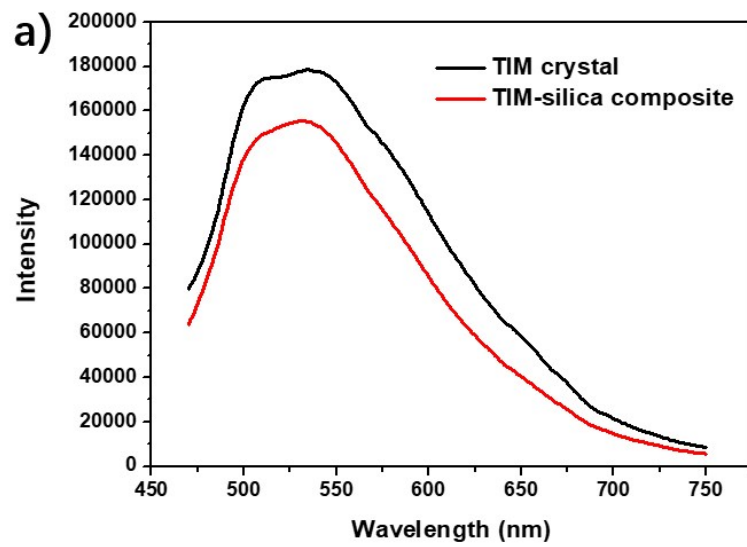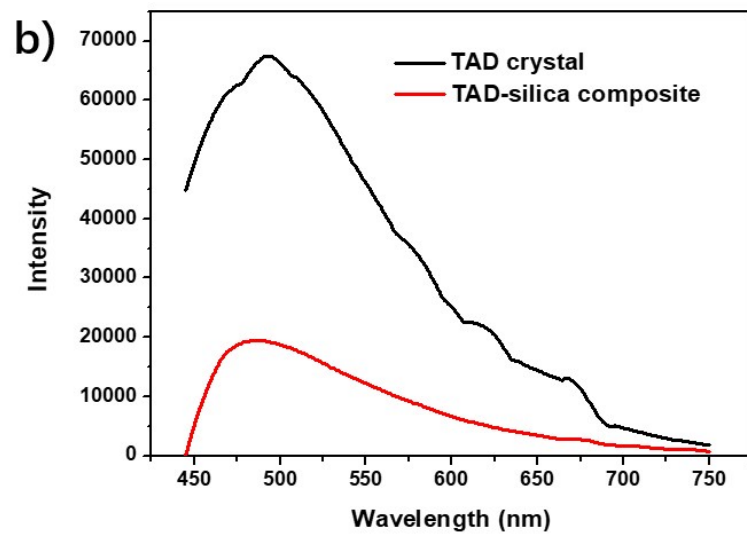

**Fig S23** Comparison of luminous intensity of TIM (a) and TAD (b) crystals with their silica composites.

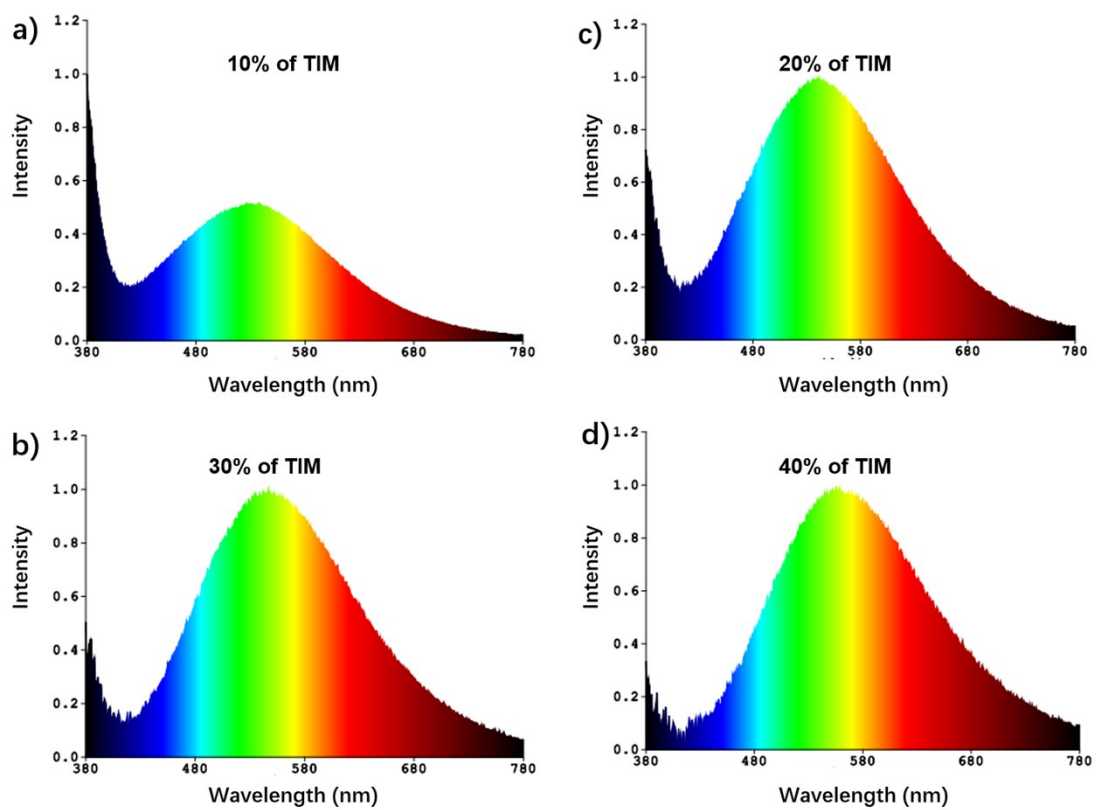

**Fig S24** Electroluminescent spectra of UV chip-driven WLED based on different amount of TIM.

**Table S7** Electroluminescent data of WLED devices driven by UV and blue chips.

| Chip type | loading amount of TIM (%) | CIE (x, y) | CCT (K) | CRI  |
|-----------|---------------------------|------------|---------|------|
| UV        | 10                        | 0.31, 0.39 | 6239    | 75.4 |
|           | 20                        | 0.34, 0.43 | 5213    | 73.1 |
|           | 30                        | 0.36, 0.45 | 4779    | 72.8 |
|           | 40                        | 0.39, 0.46 | 4200    | 73.4 |
| Blue      | 30                        | 0.21, 0.18 | 100000  | 76.1 |
|           | 40                        | 0.25, 0.24 | 34040   | 89.0 |
|           | 50                        | 0.33, 0.35 | 5669    | 84.6 |



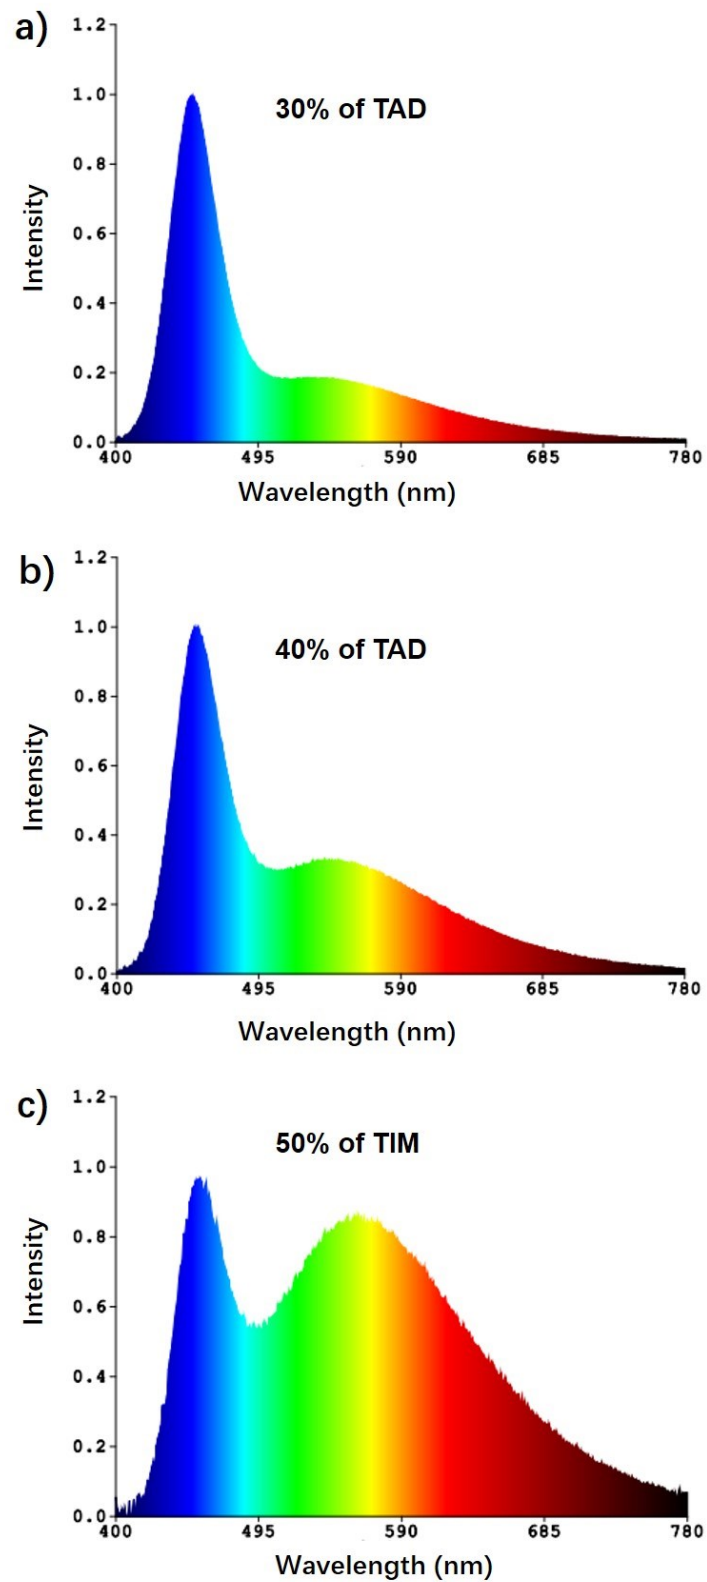

**Fig S25** Electroluminescent spectra of blue chip-driven WLED based on different amount of TIM.

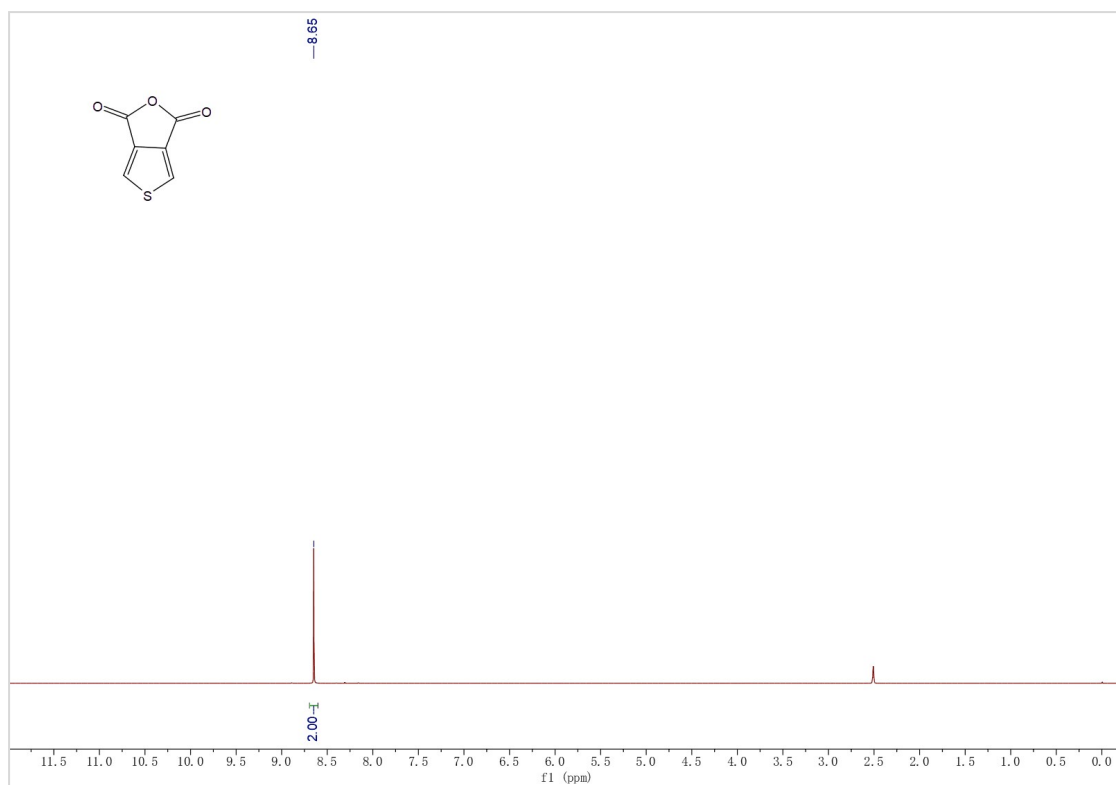

**Fig S26** <sup>1</sup>H NMR spectrum of TAD.

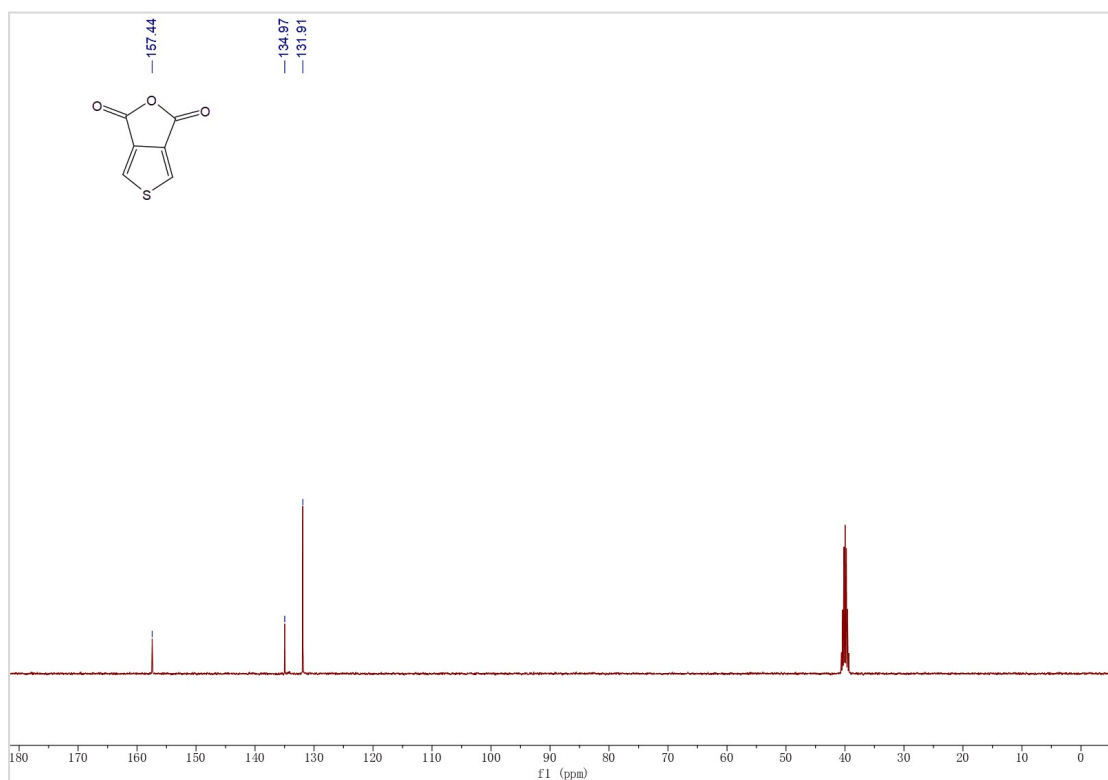

**Fig S27** <sup>13</sup>C NMR spectrum of TAD.

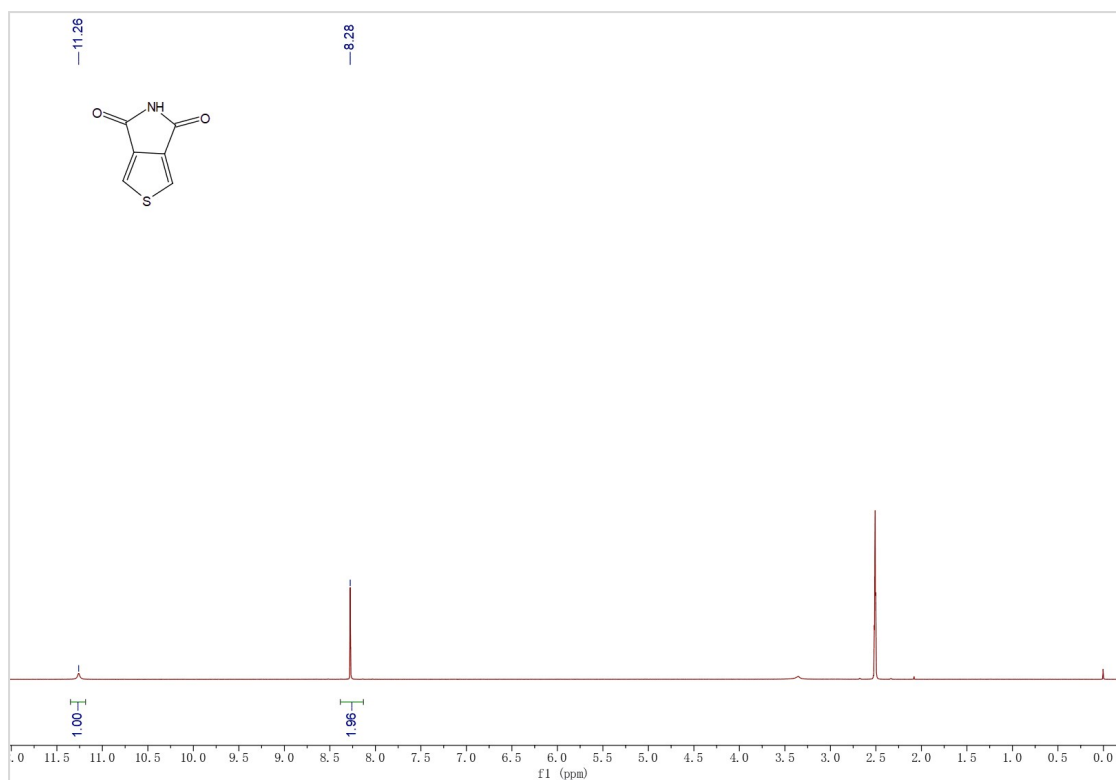

**Fig S28** <sup>1</sup>H NMR spectrum of TIM.

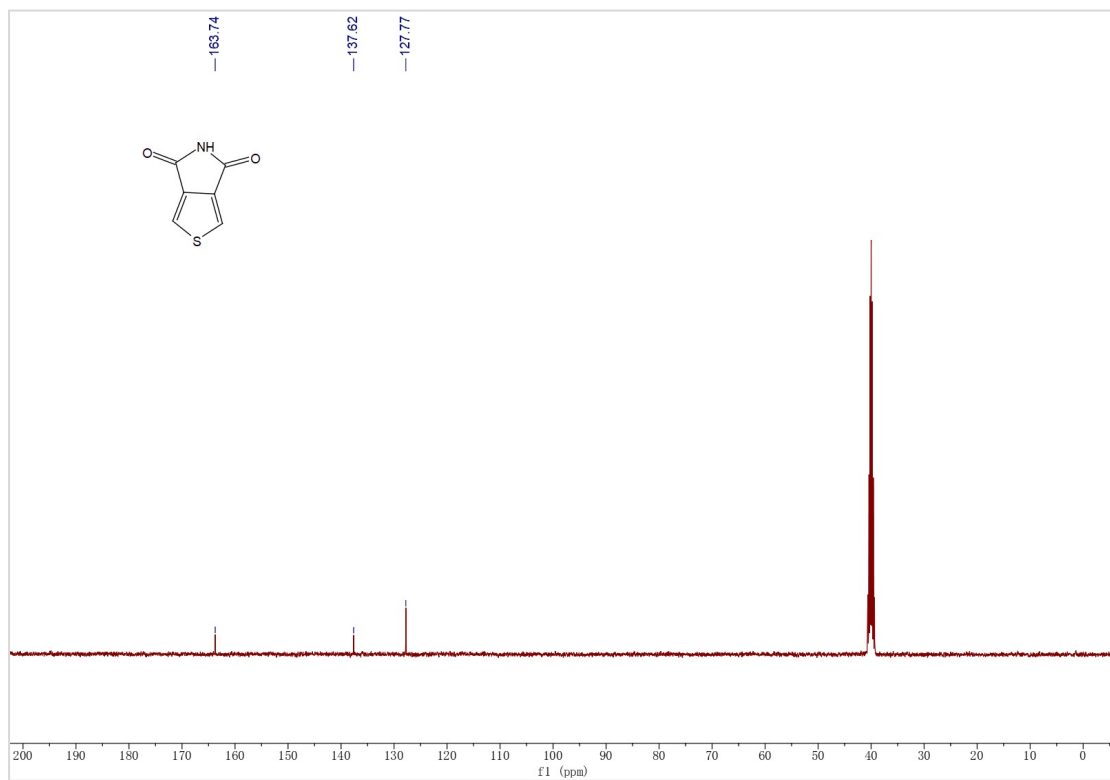

**Fig S29** <sup>13</sup>C NMR spectrum of TIM.

## Reference

- [1] T. Weller, M. Breunig, C. J. Mueller, E. Gann, C. R. McNeill and M. Thelakkat, Fluorination in thieno[3,4-*c*]pyrrole-4,6-dione copolymers leading to electron transport, high crystallinity and end-on alignment. *J. Mater. Chem. C*, 2017, **5**, 7527-7534.
- [2] R. M. W. Wolfe and J. R. Reynolds, Direct Imide Formation from Thiophene Dicarboxylic Acids Gives Expanded Side-Chain Selection in Thienopyrrolediones. *Org. Lett.*, 2017, **19**, 996–999.
- [3] N. N. Zhang, C. Sun, X. M. Jiang, X. S. Xing, Y. Yan, L. Z. Cai, M. S. Wang and G. C. Guo, Single-component small-molecule white light organic phosphors, *Chem. Commun.*, 2017, **53**, 9269-9272.
- [4] J. Wang, X. Gu, H. Ma, Q. Peng, X. Huang, X. Zheng, S. H. P. Sung, G. Shan, J. W. Y. Lam, Z. Shuai and B. Z. Tang, A facile strategy for realizing room temperature phosphorescence and single molecule white light emission, *Nat. Commun.*, 2018, **9**, 2963.
- [5] K. Wang, Y. Z. Shi, C. J. Zheng, W. Liu, K. Liang, X. Li, M. Zhang, H. Lin, S. L. Tao, C. S. Lee, X. M. Ou and X. H. Zhang, Control of Dual Conformations: Developing Thermally Activated Delayed Fluorescence Emitters for Highly Efficient Single-Emitter White Organic Light-Emitting Diodes, *ACS Appl. Mater. Interfaces*, 2018, **10**, 31515-31525.
- [6] B. Li, Z. Li, F. Guo, J. Song, X. Jiang, Y. Wang, S. Gao, J. Wang, X. Pang, L. Zhao and Y. Zhang, Realizing Efficient Single Organic Molecular White Light-Emitting Diodes from Conformational Isomerization of Quinazoline-Based Emitters, *ACS Appl. Mater. Interfaces*, 2020, **12**, 14233-14243.
- [7] X. Wu, C. Y. Huang, D. G. Chen, D. Liu, C. Wu, K. J. Chou, B. Zhang, Y. Wang, Y. Liu, E. Y. Li, W. Zhu and P. T. Chou, Exploiting racemism enhanced organic room-temperature phosphorescence to demonstrate Wallach's rule in the lighting chiral chromophores, *Nat. Commun.*, 2020, **11**, 2145.
- [8] J.-H. Tan, W.-C. Chen, S.-F. Ni, Z. Qiu, Y. Zhan, Z. Yang, J. Xiong, C. Cao, Y. Huo and C.-S. Lee, Aggregation-state engineering and emission switching in D–A–D' AIEgens featuring dual emission, MCL and white electroluminescence, *J. Mater. Chem. C*, 2020, **8**, 8061-8068.
- [9] Q. Y. Yang and J. M. Lehn, Bright white-light emission from a single organic compound in the solid state, *Angew. Chem. Int. Ed. Engl.*, 2014, **53**, 4572-4577.
- [10] Y. H. Chen, K. C. Tang, Y. T. Chen, J. Y. Shen, Y. S. Wu, S. H. Liu, C. S. Lee, C. H. Chen, T. Y. Lai, S. H. Tung, R. J. Jeng, W. Y. Hung, M. Jiao, C. C. Wu and P.

- T. Chou, Insight into the mechanism and outcoupling enhancement of excimer-associated white light generation, *Chem. Sci.*, 2016, **7**, 3556-3563.
- [11] H. Liu, X. Cheng, H. Zhang, Y. Wang, H. Zhang and S. Yamaguchi, ESIPT-active organic compounds with white luminescence based on crystallization-induced keto emission (CIKE), *Chem. Commun.*, 2017, **53**, 7832-7835.
- [12] Z. Xie, C. Chen, S. Xu, J. Li, Y. Zhang, S. Liu, J. Xu and Z. Chi, White-light emission strategy of a single organic compound with aggregation-induced emission and delayed fluorescence properties, *Angew. Chem. Int. Ed. Engl.*, 2015, **54**, 7181-7184.
- [13] C. Li, J. Liang, B. Liang, Z. Li, Z. Cheng, G. Yang and Y. Wang, An Organic Emitter Displaying Dual Emissions and Efficient Delayed Fluorescence White OLEDs, *Adv. Opt. Mater.*, 2019, **7**, 1801667.
- [14] C. Zhou, S. Zhang, Y. Gao, H. Liu, T. Shan, X. Liang, B. Yang and Y. Ma, Ternary Emission of Fluorescence and Dual Phosphorescence at Room Temperature: A Single-Molecule White Light Emitter Based on Pure Organic Aza-Aromatic Material, *Adv. Funct. Mater.*, 2018, **28**, 1802407.
- [15] Z. He, W. Zhao, J. W. Y. Lam, Q. Peng, H. Ma, G. Liang, Z. Shuai and B. Z. Tang, White light emission from a single organic molecule with dual phosphorescence at room temperature, *Nat. Commun.*, 2017, **8**, 416.
- [16] J. A. Li, J. Zhou, Z. Mao, Z. Xie, Z. Yang, B. Xu, C. Liu, X. Chen, D. Ren, H. Pan, G. Shi, Y. Zhang and Z. Chi, Transient and Persistent Room-Temperature Mechanoluminescence from a White-Light-Emitting AIEgen with Tricolor Emission Switching Triggered by Light, *Angew. Chem. Int. Ed. Engl.*, 2018, **57**, 6449-6453.
- [17] Y. Zhang, Y. Miao, X. Song, Y. Gao, Z. Zhang, K. Ye and Y. Wang, Single-Molecule-based White-Light Emissive Organic Solids with Molecular-Packing-Dependent Thermally Activated Delayed Fluorescence, *J. Phys. Chem. Lett.*, 2017, **8**, 4808-4813.
- [18] B. Xu, H. Wu, J. Chen, Z. Yang, Z. Yang, Y. C. Wu, Y. Zhang, C. Jin, P. Y. Lu, Z. Chi, S. Liu, J. Xu and M. Aldred, White-light emission from a single heavy atom-free molecule with room temperature phosphorescence, mechanochromism and thermochromism, *Chem. Sci.*, 2017, **8**, 1909-1914.
- [19] X. Ma, L. Jia, B. Yang, J. Li, W. Huang, D. Wu and W.-Y. Wong, A color-tunable single molecule white light emitter with high luminescence efficiency and ultra-long room temperature phosphorescence, *J. Mater. Chem. C*, 2021, **9**, 727-735.
